# Supplementary material for: Comorbidity of Depression and Anxiety Leads to A Poor Prognosis Following Angina Pectoris Patients: A Prospective Study
Source: Research Square preprint supplement (doi:10.21203/rs.3.rs-112803/v1), 2020-12-07
Supplement: Supplementary file 1 [file bab347c106bf147a6ec81e84.docx]

**Comorbidity of depression and anxiety leads to a poor prognosis following angina pectoris patients: A prospective study**

Bingqing Bai1#, Han Yin1,3#, Lan Guo4, Huan Ma4, Haochen Wang1,3, Fengyao Liu1,3, Yanting Liang1,3, Anbang Liu1,3, Qingshan Geng2*

* Correspondence: [gengqingshan@gdph.org.cn](mailto:gengqingshan@gdph.org.cn)

# Bingqing Bai and Han Yin contribute equally to this work.

1Guangdong Cardiovascular Institute, Guangdong Provincial People’s Hospital, Guangdong Academy of Medical Sciences, No.106 Zhongshan Er Road, Yuexiu District, Guangzhou 510080, People’s Republic of China.

2Guangdong Provincial People’s Hospital, Guangdong Academy of Medical Sciences, Guangdong Cardiovascular Institute, No.106 Zhongshan Er Road, Yuexiu District, Guangzhou 510080, People’s Republic of China.

3School of Medicine, South China University of Technology, Guangzhou, People’s Republic of China.

4Department of Cardiac Rehabilitation, Guangdong Cardiovascular Institute, Guangdong Provincial People’s Hospital, Guangdong Academy of Medical Sciences, No.106 Zhongshan Er Road, Yuexiu District, Guangzhou 510080, People’s Republic of China.
